# Supplementary material for: Pectocin M1 (PcaM1) Inhibits Escherichia coli Cell Growth and Peptidoglycan Biosynthesis through Periplasmic Expression
Source: PubMed Central journal article supplement (PMC5187517; doi:10.3390/antibiotics5040036), 2016-10-08
Supplement: antibiotics-05-00036-s001.pdf [file antibiotics-05-00036-s001.pdf]

# Pectocin M1 (PcaM1) Inhibits *Escherichia coli* Cell Growth and Peptidoglycan Biosynthesis through Periplasmic Expression

Dimitri Ch erier, Sean Giacomucci, Delphine Patin, Ahmed Bouhss, Thierry Touz , Didier Blanot, Dominique Mengin-Lecreulx and H l ne Barreteau

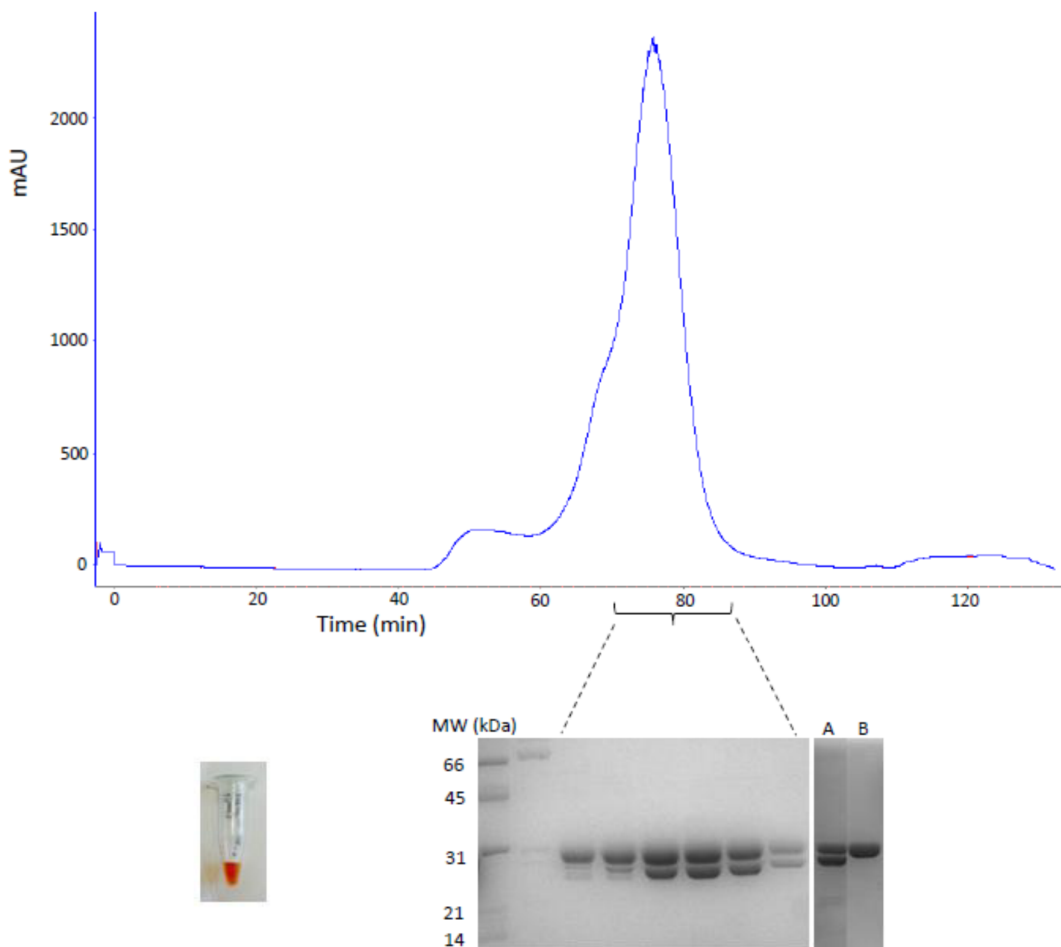

**Figure S1.** Gel filtration elution profile and SDS-PAGE of the purified wild-type PcaM1 protein. The absorbance at 280 nm was monitored, 2 mL fractions eluted between 72 and 84 min, and corresponding to the homogenous PcaM1, were collected and loaded onto SDS-PAGE. Additional lanes A and B represent native and boiled PcaM1 samples, respectively. As shown on the left (Eppendorf tube, Wesseling-Berzdorf, Germany), the purified concentrated PcaM1 has a red-brown color.

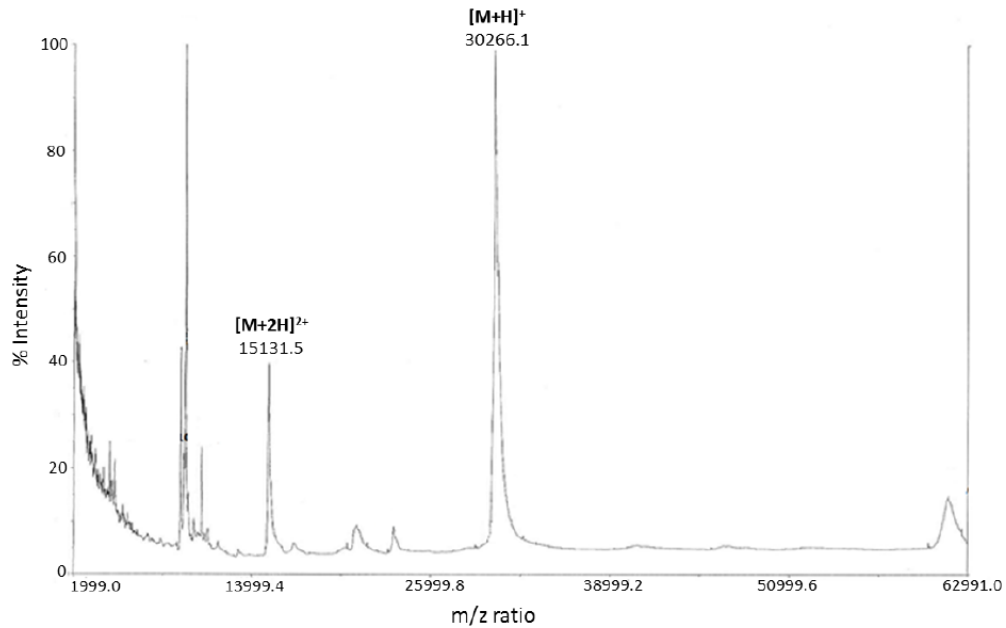

**Figure S2.** MALDI-TOF mass spectrometry analysis of the purified wild-type PcaM1. Peaks of  $m/z$  30266.1 and 15131.5 were observed, that were assigned to be the  $[M+H]^+$  and  $[M+2H]^{2+}$  ions, respectively.

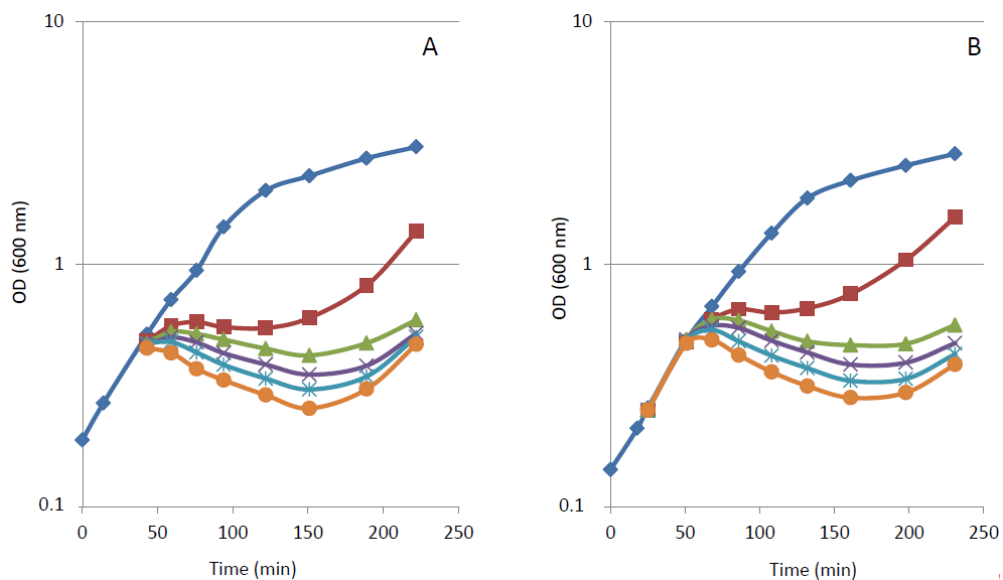

**Figure S3.** Dose-dependent effect of anhydrotetracycline on the growth of *E. coli* FB8 cells expressing the wild-type (A) or D222A mutant (B) PcaM1. Cells were grown at 37 °C in 2YT medium and protein expression was induced by addition of anhydrotetracycline at  $OD_{600} = 0.25$  ( $t_0$ ). Diamonds, squares, triangles, crosses, stars and circles correspond to anhydrotetracycline concentrations of 0, 30, 45, 60, 100 and 200 ng/mL, respectively.

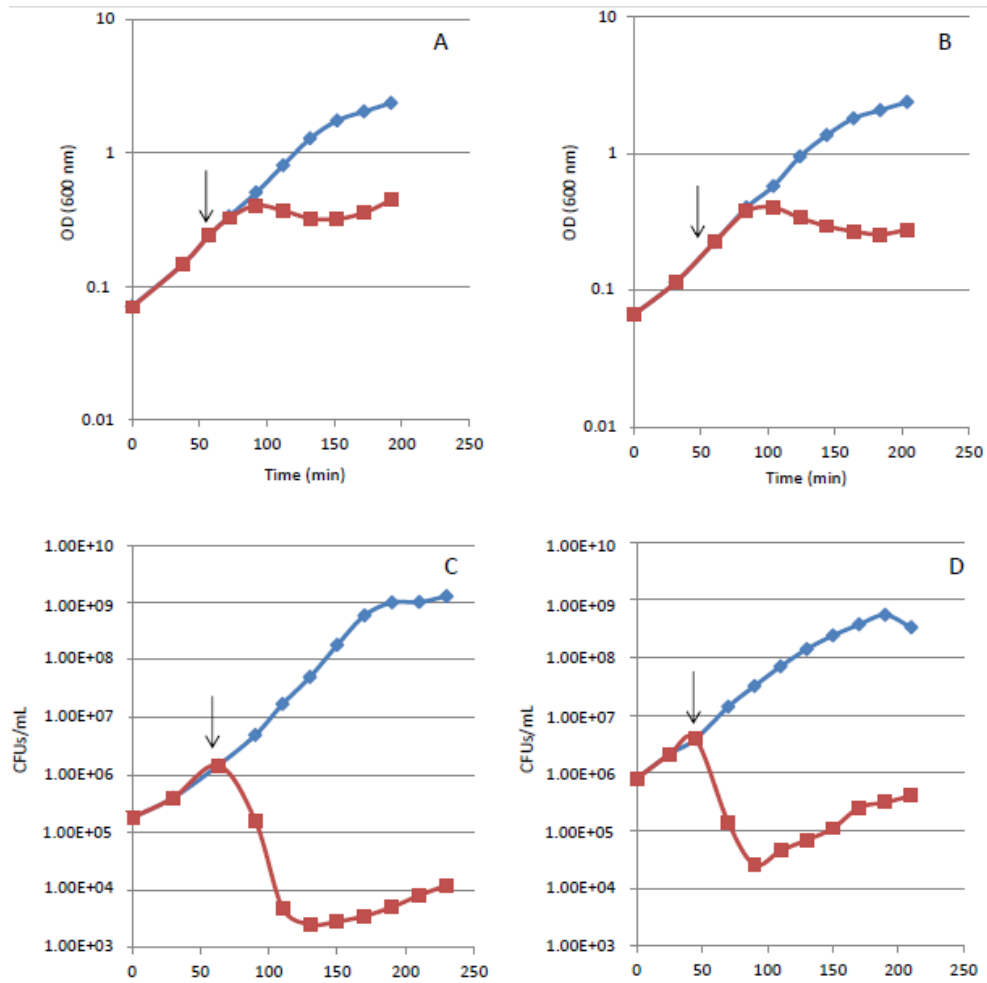

**Figure S4.** Growth (A,B) and viability (C,D) of *E. coli* FB8 cells expressing the wild-type (A,C) or D222A mutant (B,D) PcaM1. Strains were grown in 2YT medium at 37 °C. At  $OD_{600} = 0.25$ , anhydrotetracycline (arrows) was added (red curves) or not (blue curves) at a final concentration of 200 ng/mL. The representative results of three independent experiments are presented.

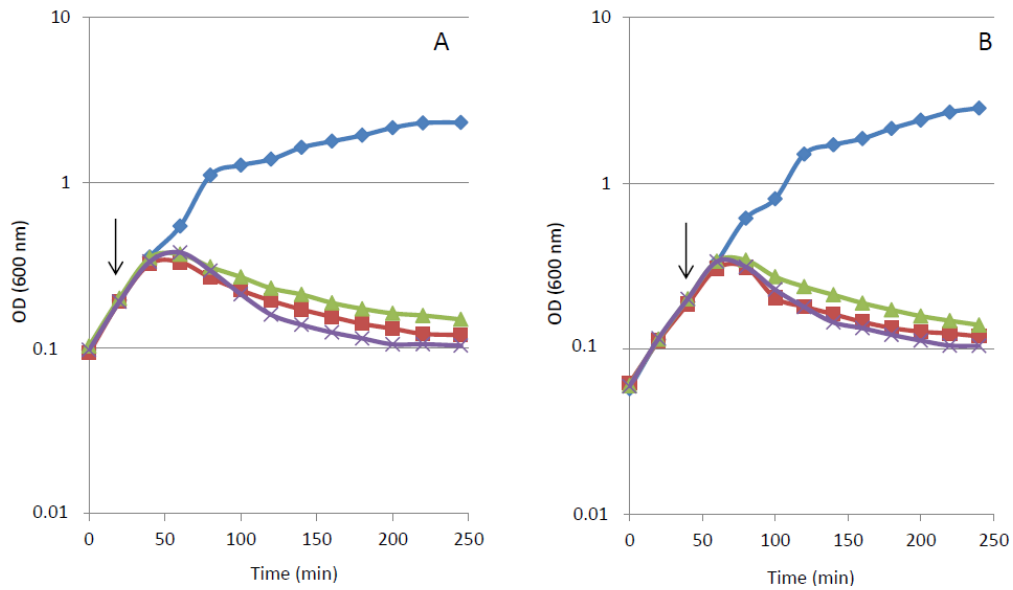

**Figure S5.** Effects of the periplasmic expression of the different PcaM1 variants on the growth of *E. coli* BW25113 (A) and BW25113  $\Delta fkpA$  (B) strains. Cells were grown in 2YT medium at 37 °C and expression of the PcaM1 variants was induced by addition of anhydrotetracycline at 200 ng/mL (arrows). Growth curves observed for strains carrying either the pASK-IBA4 empty vector, or pASK plasmids expressing the wild-type PcaM1, the D222A mutant or the isolated cytotoxic domain ( $\Delta 1-107$ ) are shown by diamonds, squares, triangles and crosses, respectively. The representative curves of three independent experiments are presented.

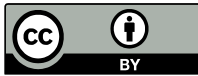

© 2016 by the authors; licensee MDPI, Basel, Switzerland. This article is an open access article distributed under the terms and conditions of the Creative Commons by Attribution (CC-BY) license (<http://creativecommons.org/licenses/by/4.0/>).
